# 1 **The influence of early life exposures on the infant gut**

## 2 **virome**

3  
4 Yichang Zhang<sup>1\*</sup>, Josué L. Castro-Mejía<sup>1\*</sup>, Ling Deng<sup>1\*#</sup>, Shiraz A. Shah<sup>2</sup>, Jonathan  
5 Thorsen<sup>2,3</sup>, Cristina Leal Rodríguez<sup>2</sup>, Leon E. Jessen<sup>2</sup>, Moira B. Dion<sup>5,6</sup>, Bo Chawes<sup>2</sup>, Klaus  
6 Bønnelykke<sup>2</sup>, Søren J. Sørensen<sup>4</sup>, Hans Bisgaard<sup>2</sup>, Sylvain Moineau<sup>5,6,7</sup>, Marie-Agnès Petit<sup>8</sup>,  
7 Jakob Stokholm<sup>1,2</sup>, Dennis S. Nielsen<sup>1#</sup>

8  
9 <sup>1</sup> Department of Food Science, University of Copenhagen, Denmark

10 <sup>2</sup> Copenhagen Prospective Studies on Asthma in Childhood, Copenhagen University Hospital,  
11 Herlev-Gentofte, Ledreborg Allé 34, DK-2820 Gentofte, Denmark

12 <sup>3</sup> Novo Nordisk Foundation Center for Basic Metabolic Research, Faculty of Health and  
13 Medical Sciences, University of Copenhagen

14 <sup>4</sup> Department of Biology, University of Copenhagen, Denmark

15 <sup>5</sup> Département de Biochimie, de Microbiologie, et de Bio-Informatique, Faculté des Sciences  
16 et de Génie, Université Laval, Québec City, QC, Canada

17 <sup>6</sup> Groupe de Recherche en Écologie Buccale, Faculté de Médecine Dentaire, Université  
18 Laval, Québec City, QC, Canada

19 <sup>7</sup> Félix d'Hérelle Reference Center for Bacterial Viruses, Faculté de médecine dentaire,  
20 Université Laval, Québec City, QC, Canada

21 <sup>8</sup> Université Paris-Saclay, INRAE, AgroParis Tech, Micalis Institute, Jouy-en-Josas, France

22

23

24 \* These authors contributed equally

25 # Corresponding author:

26 Ling Deng ([lingdeng@food.ku.dk](mailto:lingdeng@food.ku.dk)) and Dennis S. Nielsen ([dn@food.ku.dk](mailto:dn@food.ku.dk))

27 Rolighedsvej 26, Department of Food Science, University of Copenhagen, 1958

28 Frederiksberg C, Denmark

29

30

31

32

33

34 **Summary**

35           Large cohort studies have contributed significantly to our understanding of the factors  
36 that influence the development of the bacterial component of the gut microbiome (GM) during  
37 the first years of life. However, the factors that shape the colonization by other important GM  
38 members such as the viral fraction remain more elusive. Most gut viruses are bacteriophages  
39 (phages), i.e., viruses attacking bacteria in a host specific manner, and to a lesser extent, but  
40 also widely present, eukaryotic viruses, including viruses attacking human cells. Here, we  
41 utilize the deeply phenotyped COPSAC<sub>2010</sub> birth cohort consisting of 700 infants to investigate  
42 how social, pre-, peri- and postnatal factors may influence the gut virome composition at one  
43 year of age, where fecal virome data was available from 645 infants.

44           Among the different exposures studied, having older siblings and living in an urban  
45 vs. rural area had the strongest impact on gut virome composition. Differential abundance  
46 analysis from a total of 16,118 viral operational taxonomic units (vOTUs) (mainly phages, but  
47 also 6.1% eukaryotic viruses) identified 2,105 vOTUs varying with environmental exposures,  
48 of which 5.9% were eukaryotic viruses and the rest was phages. Bacterial hosts for these  
49 phages were mainly predicted to be within the *Bacteroidaceae*, *Prevotellaceae*, and  
50 *Ruminococcaceae* families, as determined by CRISPR spacer matches. Spearman correlation  
51 coefficients indicated strong co-abundance trends of vOTUs and their targeted bacterial host,  
52 which underlined the predicted phage-host connections. Further, our findings show that some  
53 gut viruses encode important metabolic functions and how the abundance of genes encoding  
54 these functions is influenced by environmental exposures. Genes that were significantly  
55 associated with early life exposures were found in a total of 42 vOTUs. 18 of these vOTUs  
56 had their life styles predicted, with 17 of them having a temperate lifestyle. These 42 vOTUs  
57 carried genes coding for enzymes involved in alanine, aspartate and glutamate metabolism,  
58 glycolysis-gluconeogenesis, as well as fatty acid biosynthesis. The latter implies that these  
59 phages could be involved in the utilization and degradation of major dietary components and  
60 affect infant health by influencing the metabolic capacity of their bacterial host.

61           Given the importance of the GM in early life for maturation of the immune system  
62 and maintenance of metabolic health, these findings provide a valuable source of information  
63 for understanding early life factors that predispose for autoimmune and metabolic disorders.

64

65

## 66 Introduction

67 Early life gut microbiome (GM) establishment plays a fundamental role in shaping  
68 host physiology and health<sup>1,2</sup> with early life GM imbalances being linked to onset and  
69 progression of chronic diseases later in life, such as obesity<sup>3</sup>, diabetes<sup>4,5</sup>, and asthma<sup>2</sup>.

70 To date, GM research has generally focused on understanding the importance of the  
71 bacterial GM component, but recent findings indicate that the vast and diverse population of  
72 viruses found in the gut (collectively called the “virome”) also play a prominent role in gut  
73 microbial ecology<sup>6-9</sup>. Amidst these biological entities, bacterial viruses, also termed  
74 bacteriophages (phages), are the most diverse and abundant particles of the GM<sup>9-11</sup> and they  
75 represent a major reservoir of genetic diversity influencing not only GM composition, but also  
76 the GM metabolic potential<sup>12,13</sup>. Disease-specific alterations in the gut virome have been  
77 reported in several chronic conditions<sup>14</sup> such as inflammatory bowel disease<sup>15</sup>, colorectal  
78 cancer<sup>16</sup>, necrotizing enterocolitis in preterm infants<sup>17</sup>, severe acute malnutrition<sup>18</sup>, type-1  
79 diabetes<sup>19,20</sup> and other autoimmune diseases such as rheumatoid arthritis<sup>21</sup>. The role of the gut  
80 virome in shaping the GM is underlined by the observation that fecal virome transfer from  
81 healthy donors to recipients with a dysbiotic GM prevent or ameliorate symptoms associated  
82 with metabolic<sup>22</sup> and gastrointestinal<sup>23,24</sup> disorders.

83 While various early-life factors such as birth mode, siblings, diet and exposure to  
84 antibiotics has been found to influence development of the gut bacterial populations<sup>1,25</sup>, little  
85 is known about which factors shape the gut virome. The few attempts that have characterized  
86 the gut virome early in life have revealed that its composition is highly dynamic<sup>26-28</sup>, affected  
87 by delivery mode<sup>6</sup> and the first bacterial colonizers<sup>29</sup> as well as being enriched in phages  
88 belonging to the *Microviridae* family<sup>10,27</sup>. Moreover, its transmission-dynamics after birth  
89 follows a stepwise assembly, with breastfeeding playing a protective role against eukaryotic  
90 viral infections<sup>30,31</sup>. Understanding how environmental exposures and phenotypes intertwine  
91 the vector space conformed by viruses, bacteria, host, and their functional attributes remains  
92 an unsolved task.

93 In a recent detailed investigation of the infant gut virome, we showed a massive  
94 diversity of hitherto undescribed phages<sup>9</sup>. In this cross-sectional study of the gut virome of  
95 645 infants at one year of age enrolled in the COPSAC<sub>2010</sub> cohort<sup>32</sup> more than ten thousand  
96 viral species distributed over 248 viral families and 17 viral order-level clades were detected.  
97 Here we investigate how social, pre-, peri- and postnatal factors influence the gut virome  
98 composition at one year of age. Our findings demonstrate how early life exposures are linked  
99 to the abundance of specific viruses, as well as their co-abundance and concordance with their  
100 predicted bacterial hosts. Metabolic functions encoded in the genomes of these viruses  
101 displayed enrichment of genes important for bacterial physiology in response to exposures,

102 some of which are likely associated with dietary elements (e.g., degradation of complex  
103 carbohydrates) and others that may influence infant growth and health.

104

## 105 **Results**

### 106 **Composition of DNA viruses in the gut of Danish infants**

107 A total of 645 stool samples from 1-year old infants in the COPSAC<sub>2010</sub> cohort<sup>32</sup> were  
108 obtained and analyzed<sup>9</sup>. Virions were isolated, concentrated and their genome was sequenced  
109 using a shotgun metagenome strategy<sup>9,33</sup>. Following assembly, a total of 16,118 species-level  
110 clustered viral representative contigs (here termed viral Operational Taxonomic Units –  
111 vOTUs) were obtained. Around 70% of the vOTUs were affiliated to five viral classes  
112 (*Arfiviricetes*, *Caudoviricetes*, *Faserviricetes*, *Malgrandaviricetes* and *Tectiliviricetes*)  
113 (Figure 1A and 1I). Almost 18.8% of the vOTUs (n=3,029) were considered putative satellite  
114 phages as contigs lacked genes coding for structural proteins but encoded other viral proteins  
115 (e.g., integrases or replicases) and were conserved in size and gene content across multiple  
116 samples. In addition, 11.8% of the vOTUs (n=1,895) were categorized as unclassified viral  
117 fragments (Figure 1A).

118 The largest genomes (>10 kb) were observed among *Caudoviricetes*, which  
119 constituted the vast majority of vOTUs (Figure 1B). The genomes, dominated by  
120 *Caudoviricetes* (tailed, double-stranded DNA phages) and *Malgrandaviricetes* (non-tailed,  
121 single-stranded DNA phages), followed a bi-/multi-modal distribution (Hartigans' Dip test, P  
122 < 0.0001) based on their genome sizes (Figure 1B).

123 Bacterial hosts as well as lifestyle (temperate/virulent) of the vOTUs were predicted  
124 using CRISPR spacers and the presence of integrases<sup>9</sup>, respectively (Figure 1C). Because  
125 phages tend to have comparable *k*-mer frequencies to those of their hosts<sup>34,35</sup>, we also  
126 performed dimensionality reduction on tetramer vectors to confirm global host associations as  
127 a complement to our viral taxonomy<sup>9</sup>. Using unsupervised stochastic neighbor embedding (t-  
128 SNE) dimensionality reduction, vOTUs targeting the same hosts as determined by CRISPR  
129 spacers (Figure 1D) or belonging to the same viral classes (Figure 1E) were found to clearly  
130 cluster together. Previously only *Enterobacteriaceae* and *Bacteroidetes* have been shown to  
131 be the hosts of non-tailed *Malgrandaviricetes*<sup>36</sup>, but when examining the bacterial hosts, we  
132 observed that in addition to *Bacteroidetes*, also *Ruminococcaceae*, *Clostridiaceae*,  
133 *Erysipelotrichaceae* and *Sutterellaceae* are predicted as hosts of *Malgrandaviricetes* viruses  
134 (Figure 1C and S1). With respect to lifestyle, *Streptococcaceae* and most families of the  
135 *Bacteroidetes* have a greater proportion of vOTUs recognized as virulent than temperate  
136 (Figure 1C and Table S2).

137 The distribution of vOTUs was very individual-specific, with less than 5% of vOTUs  
138 appearing in more than 50% of the samples (Figure 1F). However, this still adds up to around  
139 800 vOTUs that are shared among a majority of infants and representing, on average, more  
140 than 20% of the reads (Figure 1F). The proportion of vOTUs classified as *Caudoviricetes*  
141 (Figure 1G) as well as those infecting *Bacteroidaceae* and *Bifidobacteriaceae* (Figure 1H)  
142 increased as a function of prevalence.

143

#### 144 **Environmental exposures influence viral diversity**

145 A range of pre-, peri-, and postnatal as well as social factors were recorded for the  
146 enrolled infants and their families (Supplementary Table S1). Having older siblings was  
147 associated with higher vOTU richness (linear mixed model,  $P = 0.048$ , estimate = 69.14, 95%  
148 CI = [0.58, 137.52]) and lower evenness (Shannon  $H'$ ) (linear mixed model,  $P = 0.003$ ,  
149 estimate = -0.30, 95% CI = [-0.50, -0.10]) (Figure 2A-B and 2E-F) at one year of age.  
150 Likewise, a higher birth weight was linked to higher vOTU richness (linear mixed model,  $P =$   
151  $0.007$ , estimate = -85.76, 95% CI = [-153.98, -17.56]) (Figure 2A and 2E). Dietary factors  
152 were also found to influence the gut virome at one year of age, with late introduction of eggs  
153 in the diet being associated with lower viral evenness (Shannon  $H'$ ) (linear mixed model,  $P =$   
154  $0.012$ , estimate = 0.25, 95% CI = [0.05, 0.45]) (Figure 2A and 2F). The mothers were enrolled  
155 in a nested randomized placebo-controlled trial of fish oil to the mothers during the third  
156 trimester of pregnancy<sup>37,38</sup>. Receiving fish oil during pregnancy was associated with increased  
157 gut vOTU richness (linear mixed model,  $P = 0.038$ , estimate = 71.60, 95% CI = [3.90, 139.22])  
158 of the infants at one year of age (Figure 2A). The design also examined the difference in  
159 vitamin D between high and standard doses<sup>39</sup>, which had no effect on the viral community in  
160 our analysis. Interestingly, other factors that have been found to influence the bacterial GM  
161 component during infancy such as birth mode, use of antibiotics, and duration of exclusive  
162 breastfeeding did not seem to influence gut virome alpha-diversity measures at one year of age  
163 in this cohort (Figure 2A-B).

164 Regarding virome composition, Bray-Curtis dissimilarity analysis (weighted measure,  
165 which is therefore mainly influenced by more abundant vOTUs) showed a link  
166 (PERMANOVA,  $P = 0.049$ ,  $R^2=0.0016$ ) between maternal body mass index (BMI) and  
167 virome composition at one year of age (Figure 2C, 2G and S1A); while Sørensen-Dice distance  
168 (unweighted binary metric and therefore mainly influenced by more rare vOTUs) revealed that  
169 a number of pre- and perinatal exposures were linked with virome composition differences  
170 (PERMANOVA,  $P \leq 0.05$ ), namely weight at birth, fish oil supplementation during  
171 pregnancy, hospitalization after birth, and preeclampsia (Figure 2D, 2H and S2B). Both Bray-  
172 Curtis and Sørensen-Dice metrics showed significant differences in virome composition for  
173 children having older siblings (PERMANOVA,  $P = 0.006$ ,  $R^2=0.0018$  and  $P = 0.001$ ,

174 R2=0.0029 for Bray-Curtis and Sorensen-Dice, respectively), and whether the family was  
175 living in an urban or a rural area (PERMANOVA,  $P = 0.003$ , R2=0.0019 and  $P = 0.049$ ,  
176 R2=0.0016 for Bray-Curtis and Sorensen-Dice, respectively) (Figure 2C-D, 2H and S2A-B).

177

### 178 **Environmental exposure variables influence the abundance of specific vira**

179 Subsequently, we determined how the distribution of vOTUs differed between the  
180 nine exposures (Figure 2C-D) found to significantly influence overall gut virome composition  
181 (preeclampsia was not included due to highly unbalanced sample size, see Supplementary  
182 Table S1). A total of 2,105 differentially abundant vOTUs affiliated to 173 viral families and  
183 19 families of bacterial hosts were identified by DESeq2, with having older siblings being  
184 associated with 822 differential abundant vOTUs, while being hospitalized after birth being  
185 associated with 212 differential abundant vOTUs (Figure 3). For perinatal covariates, vOTUs  
186 differing in abundance were predicted to infect a range of different hosts, but interestingly  
187 revealed a pronounced lower abundance towards those infecting *Bacteroidaceae*,  
188 *Ruminococcaceae* and *Streptococcaceae* associated with with maternal antibiotic usage and  
189 hospitalization after birth (Figure 3). Postnatal factors like specific dietary patterns (late  
190 introduction of eggs in the diet), presence of older siblings in the house and living in a rural  
191 environment, were associated with a higher abundance of vOTUs infecting  
192 *Bifidobacteriaceae*, *Bacteroidaceae*, *Prevotellaceae*, *Tannerellaceae*, *Ruminococcaceae* and  
193 *Sutterellaceae*.

194 To further integrate these findings in the context of the gut bacterial component, we  
195 used 16S rRNA gene (V4 region) amplicon sequencing (bacterial OTUs - bOTUs) data  
196 previously published for this cohort (Stokholm et al. 2018) to determine virus-host co-  
197 abundances. Spearman correlation coefficients ( $\rho$ ) were calculated between the abundance of  
198 the above identified differentially different abundant vOTUs and bOTUs across samples. Only  
199 bOTUs that were strongly associated ( $\rho \geq 0.3$ ) with at least one vOTU were retained. If a vOTU  
200 was correlated with a bOTU, the bOTU family tended to be consistent with the predicted host  
201 family of the vOTU (Figure S3A). These virus-host co-abundances indicate there is a high  
202 degree of inter-relatedness between phages and their host in response to environmental  
203 exposures. This was supported by the fact that the same perinatal and postnatal covariates were  
204 also significantly associated with bOTU diversity and composition (Figure S4A-D). Overall,  
205 among the 91 co-abundant vOTUs ( $\rho \geq 0.3$ ), vOTUs that infect the same bacterial host family  
206 were in most cases closely related genetically, indicating a high degree of co-evolution  
207 between bacterial hosts and the phages that infect them (Figure S3B). To confirm the above-  
208 mentioned findings, we repeated the analysis of virus-host co-abundances using shotgun  
209 metagenomic data from the same cohort<sup>40</sup>. We found again that viruses and their bacterial  
210 hosts were highly correlated supporting the same conclusion as above (Figure S4E).

211

## 212 **Functional profiles of gut viruses are linked with environmental exposures**

213 Differentially abundant vOTUs were subjected to gene (open reading frame, ORF)  
214 prediction, and annotated based on KEGG Orthology (KO) using KofamScan<sup>41</sup>. As seen from  
215 figure S5A, 0.82% of genes matched known metabolism-related orthologs, while the  
216 remaining genes with KO assignments (8.48% of predicted genes) encoded genes related to  
217 genetic information processing and signaling and cellular processes, representing typical viral-  
218 associated traits required to accomplish replication<sup>42</sup>. The remaining 90.7% of the predicted  
219 genes were not annotated by the database.

220 Next, we focused on determining genes with metabolic functions having the potential  
221 to enhance host fitness and drive metabolic reprogramming of the bacterial host<sup>43</sup>. The gut  
222 virome of infants with older siblings were enriched in genes related to O-antigen nucleotide  
223 sugar biosynthesis and seleno-compound metabolism, while infants without siblings were  
224 enriched in genes related to carbon fixation in photosynthetic organisms (Fisher's exact test,  $P$   
225  $< 0.05$ ; Figure 4A) (the link to photosynthetic microorganisms may be caused by the KEGG  
226 database not being optimized for vira). The gut of infants living in rural areas or that were  
227 introduced to eggs in their diet later in life (above the median age when eggs were introduced  
228 in the diet) were enriched in viral encoded genes associated with glycolysis/gluconeogenesis  
229 and O-antigen nucleotide sugar biosynthesis, whereas the gut of infants living in urban areas  
230 or that were introduced to eggs relatively early in life were enriched in viral genes associated  
231 with thiamine metabolism. Infants with birth weight above the median or whose mothers were  
232 not obese also encoded genes involved in diverse pathways involved in e.g. vitamin synthesis.  
233 Further, the gut virome of infants whose mothers received fish oil during pregnancy or were  
234 prescribed antibiotics during delivery encoded genes related to purine metabolism (Figure 4A).

235 To determine how virally encoded gene functions associate with the microbial  
236 composition, we linked back enriched genes to the vOTU of origin (Figure 4B). 94% of  
237 lifestyle predicted vOTUs ( $n=17$ ) were temperate. Genes associated with two classes of amino  
238 acid metabolisms (i.e. alanine, aspartate and glutamate metabolism and lysine biosynthesis)  
239 were conserved across *Alistipes* and *Faecalibacterium* targeting vOTUs, respectively. In  
240 addition, multiple carbohydrate metabolism enzyme encoding genes were found to be widely  
241 encoded by *Blautia*, *Prevotella*, *Ruminococcus* and *Faecalibacterium* targeting vOTUs. These  
242 encoded enzymes including L-lactate dehydrogenase, ribose-phosphate pyrophosphokinase  
243 and aldose 1-epimerase (Figure S5D). Energy metabolism genes were found in *Prevotella* and  
244 *Faecalibacterium* targeting vOTUs, while nicotinate and nicotinamide metabolism genes were  
245 mapped in *Ruminococcus* and *Escherichia* targeting vOTUs (Figure 4B).

246 Phage-host co-abundance (Figure S3A), was further confirmed by Procrustes analysis.  
247 The linking of the virome and bacteriome compositions revealed a strong correlation one to

248 another ( $P < 0.001$ ,  $r = 0.52$ ) (Figure S5B-C). The cumulative abundance of all bOTUs  
249 belonging to the bacterial genera *Ruminococcus*, *Prevotella* and *Faecalibacterium*, which  
250 were found to be the main bacterial host of vOTUs carrying the above metabolic genes (Figure  
251 4B) and having previously been reported to be highly associated with stable viral  
252 communities<sup>44</sup>, was highly correlated with rural vs. urban living and having older siblings  
253 (Figure 4C-E). These results emphasize the potential role of phage-host association in  
254 metabolic regulation.

255

256

## 257 Discussion

258 The gut of healthy newborns is usually devoid of viruses at birth, but it is rapidly  
259 colonized afterwards<sup>27,30</sup>. Still relatively few studies have focused on the assembly of the gut  
260 virome within the first year of life and the factors that influence it<sup>6,26,27,30</sup> and even less is  
261 known about the environmental exposures that shape the gut virome.

262 Here, we leveraged a massive gut virome dataset from healthy infants at 1-year of age,  
263 and integrated measures of viral diversity such as sequence composition, viral hosts, and  
264 phage lifestyles<sup>9</sup>, (see Figure 1) with social, pre-, peri- and postnatal environmental exposures.  
265 We revealed the effects of these exposures on viral community and the possible effects on  
266 metabolism.

267 In previous reports, *Crassvirales* (class *Caudoviricetes*) and *Microviridae* (class  
268 *Malgrandaviricetes*) phages were found to be the two most abundant viral groups in the adult  
269 human gut, with their relative abundance being negatively correlated<sup>19,44-47</sup>. Here, in one-year-  
270 old infants, a similar observation was made, members of the *Caudoviricetes* and  
271 *Malgrandaviricetes* classes were the most abundant phages.

272 Interestingly, ongoing exposures such as having older siblings and residential location,  
273 as well as past exposures (e.g., birth weight, preeclampsia) were linked with gut virome  
274 composition at one year of age. However, it is still possible that the prenatal and perinatal  
275 exposures still influenced the immune education earlier in life and remnants of the interplay  
276 are still tangible at 1-year of age<sup>5</sup>. Among the exposures significantly influencing the gut  
277 virome composition, the largest effect sizes were from residential location (rural vs. urban)  
278 and having older siblings (see Figure 2C and 2D). Interestingly, urbanization has been reported  
279 to have a significant impact on the composition of the adult viral community, with individuals  
280 living in urban areas having higher abundance of *Lactococcus* (family *Streptococcaceae*)  
281 phages<sup>48</sup>. The latter is presumably associated with the consumption of dairy products. We  
282 show that the living environment also affects the gut virome of infants, and that



283 *Streptococcaceae* targeting phages are also more abundant in infants living in urban areas,  
284 possibly reflecting differences in dietary habits rather than residence *per se* (Figure 3).

285 Having older siblings influences the development of the bacterial community in early  
286 life<sup>49-51</sup> and here we show that having older siblings is also associated with gut virome  
287 composition at one year of age. Importantly, from a translational angle, early-life exposures  
288 may affect the establishment of health phenotypes, such as the protective role of breastfeeding  
289 against eukaryotic-viral infections in the neonatal period<sup>30</sup>. Combining gut bacterial  
290 compositional data with gut virome composition (Figure S3A and S5B-C) in our cohort  
291 elucidates the co-abundance of phages and their hosts, underlying the role of phage-host  
292 interactions in shaping the GM. Most of these viruses (Figure S3A) have temperate lifestyles,  
293 as evidenced by the presence of genes coding for integrases. Thus, these temperate phages  
294 appear to have the ability to integrate their genome into the bacterial hosts and become  
295 prophages at some point.

296 Gut virome members have the potential to modulate biochemical processes<sup>12,13,52</sup>. The  
297 functional prediction of the genes derived from vOTUs co-varying with exposures, revealed  
298 up to 90% of genes with unknown functions. It emphasizes that proteins with yet  
299 uncharacterized functions are potentially playing a role in the regulation of human host  
300 phenotypes. Certain predicted gene functions linked to metabolic activities, such as alanine,  
301 aspartate and glutamate metabolism, amino sugar and nucleotide sugar metabolism and  
302 glycolysis/gluconeogenesis, which are likely associated with dietary intake and degradation of  
303 macronutrients, were associated with fish in the diet, birth weight, residence location and egg  
304 in the diet (Figure 4A). Maternal obesity alters fatty acid metabolism and changes in gene  
305 expression of lipid metabolism in infants, which cause a higher risk of developing obesity and  
306 its complications, neuropsychiatric disorders and asthma<sup>53,54</sup>. We find here that viral genes  
307 associated with normal weight mothers were predominantly enriched in fatty acid biosynthesis  
308 compared to obese mothers, which may be an intermediate pathway by which maternal obesity  
309 affects child health. In addition, for biotin metabolism, which is known to be impaired by  
310 severe obesity<sup>55</sup>, many phage genes are also observed to be enriched in infants from mothers  
311 with BMI below 25 in our data. The mothers enrolled in the cohort participated in a  
312 randomized clinical trial where they were randomized to receiving fish oil or a placebo from  
313 week 24 of pregnancy to one week after birth<sup>38,56</sup>. The design also examined the difference in  
314 vitamin D between high and standard doses<sup>39</sup>, which had no effect on the viral community in  
315 our analysis. Of note, the supplementation of fish oil during pregnancy was not found to  
316 influence the gut bacterial component at age one year. Here we report that the same  
317 intervention has some influence on the gut virome at age one year, but the effect is only  
318 borderline significant. The infants of mothers that received fish oil had viral genes involved in  
319 lysine biosynthesis, glycerophospholipid metabolism, and purine metabolism – metabolic

320 activities that have been associated to fish oil supplementation<sup>57,58</sup>, but never attributed to gut  
321 virome composition. Interestingly, most of these metabolism-related genes were conserved  
322 across temperate vOTUs targeting *Ruminococcus*, *Faecalibacterium* and *Prevotella* spp.  
323 (Figure 4B). These genera have been consistently reported to be enriched in Danish and  
324 American subjects with a diet rich in carbohydrates, resistant starch, and fibers, and being  
325 determinants of the so-called *Prevotella*-enterotype<sup>59,60</sup>. The *Prevotella*-enterotype is  
326 established early in life (between 9-36 months of age)<sup>61-63</sup> and have been previously suggested  
327 as markers of GM maturity at age one year<sup>2,64,65</sup>. Stokholm et al. (2018) reported delayed GM  
328 maturation as a risk factor for later development of asthma indicating the importance of these  
329 microbes for immune maturation.

330 Although our study is currently unable to assess how these gut virome associated  
331 genes are actively involved in either enhancing either phage or host fitness, or both, our data  
332 underlines the potential importance of bacteriophage-encoded metabolic genes and delivers an  
333 initial insight of the type of metabolic content conveyed by the gut virome in association to  
334 environmental variables.

335 In summary, our data provides detailed insight into the influence of common  
336 environmental factors that shape the gut virome during early life. We also uncover that key  
337 gut metabolic functions can be encoded by viral genes, which suggest that, in addition of  
338 shaping gut bacteriome composition, phages may directly play a role in metabolic activities.

339

## 340 **Methods**

### 341 **Study participants and Ethics**

342 Participants belong to the COPSAC<sub>2010</sub> cohort<sup>32</sup>. Fecal samples for virome extraction  
343 sequencing and analysis were collected from all infants at age 1 year. The study was conducted  
344 in accordance with the Declaration of Helsinki and was approved by The National Committee  
345 on Health Research Ethics (H-B-2008-093) and the Danish Data Protection Agency (2015-41-  
346 3696). Both parents gave written informed consent before enrollment.

347

### 348 **Sample collection, sequencing, virome assembly**

349 Preparation of fecal samples, and extraction and sequencing of virions was carried out  
350 using a previously described protocol<sup>33</sup>. Briefly, viral-associated DNA was subjected to short  
351 MDA amplification and libraries were prepared following using manufacturer's procedures  
352 for the Nextera XT kit (FC-131-1096 Illumina, California). Libraries were single-end high-  
353 throughput sequenced on the Illumina HiSeq X platform. Details of the pipeline for data  
354 processing, de-novo assembly, quality control, bacterial-host and lifestyle predictions,  
355 abundance-mapping (vOTU table), and taxonomy of complete and partial viral genomes (here

356 termed vOTUs) can be found in Shah et al. (2021). 16S rRNA gene amplicon data (bOTU  
357 table) from the same cohort's participants were retrieved from Stokholm et al. (2018).

358

### 359 **Environmental exposures**

360 Briefly, during scheduled visits to the COPSAC clinic, information on a wide range  
361 of exposures was collected. A total of 30 environmental exposures were investigated and were  
362 grouped into social (n = 6), pre- (n = 4), peri- (n = 9) and postnatal (n = 11) exposures based  
363 on whether they occurred or existed before birth. See Supplementary Table S1 for a complete  
364 list of the exposures.

365

### 366 **Statistics and data analysis**

367 Analyses on diversity were carried out on contingency tables gathering vOTUs  
368 abundance. Abundance data was normalized by reads per kilobase per million (RPKM).  
369 Alpha-diversity (Observed vOTUs and Shannon Index) indices and Beta-diversity (Bray-  
370 Curtis and Sørensen-Dice distances) matrices were generated using the package phyloseq  
371 (version 1.42.0)<sup>66</sup>. The contribution of each covariate to explain vOTUs community structure  
372 (as determined by Sørensen-Dice similarity and Bray-Curtis dissimilarity metrics) was  
373 calculated using distance-based redundancy analysis (db-RDA) models coupled to adonis  
374 PERMANOVA (n permutations = 999) in package vegan (version 2.6-2)<sup>67</sup>, while the effect  
375 size of the same covariates on alpha-diversity was calculated with linear mixed models from  
376 the package lmerTest (version 3.1-3)<sup>68</sup>. All linear mixed models accounted for technical  
377 variation between runs using sequencing lane as the random effect.

378 Different differential abundance analysis methods were evaluated by DAtest<sup>69</sup>.  
379 DESeq2 (version 1.36.0) performed well with a low false positive rate and a high ability to  
380 detect differential vOTUs for our data<sup>70</sup>. The sequencing lane was considered as a factor-  
381 covariate. The raw reads count table of each sample for vOTUs were prepared as input. All  
382 parameters are default except for sfType which is set to poscount. Benjamini and Hochberg  
383 method was adapted to correct the p-values. vOTUs with adjusted p-value  $\leq 0.001$  and  $\log_2$   
384 fold change  $\geq |1|$  were selected for downstream analyses.

385 Spearman's rank correlations were used to test univariate associations of continuous  
386 data, and results were visualized in a heatmap. MAFFT<sup>71</sup> was used to generate the phylogenetic  
387 tree file for those highly correlated vOTUs. The phylogenetic tree was visualized using the R  
388 package ggtree (version 3.4.0)<sup>72</sup>. Procrustes analysis (R package vegan) was performed on  
389 vOTUs as target block and 16S rRNA gene data as rotatory block (n permutations = 999),  
390 while using the first two constrained components (CAP1 and CAP2) of db-RDA models for  
391 each data block.

392 ORF calling on selected vOTUs was executed with Prodigal<sup>73</sup>. To determine  
393 metabolic function, genes were annotated based on KEGG Orthology using KofamScan<sup>41</sup> and  
394 filtered by default thresholds. Enricher function in clusterProfiler package (version 4.6.0) was  
395 applied to detect whether genes in differently abundant vOTUs were enriched in the metabolic  
396 pathway<sup>74</sup>.

397 All analyses were carried out in R (version 4.0.2) and results were visualized with the  
398 package ggplot2 (version 3.3.6)<sup>75</sup>.

399

#### 400 **Data and code availability**

401 Sequencing FASTQ files are available on ENA under project number PRJEB46943.  
402 All cohort participants' individual-level data are protected by Danish and European law and  
403 are not publicly available. Codes for data analyses are available from the authors upon request.

404

#### 405 **Acknowledgements**

406 We express our deepest gratitude to the children and families of the COPSAC<sub>2010</sub>  
407 cohort study for all their support and commitment. We acknowledge and appreciate the unique  
408 efforts of the COPSAC research team.

409

#### 410 **Funding**

411 This work is supported by the Joint Programming Initiative 'Healthy Diet for a  
412 Healthy Life', specifically here, the Danish Agency for Science and Higher Education, Institut  
413 National de la Recherche Agronomique (INRA), and the Canadian Institutes of Health  
414 Research (Team grant on Intestinal Microbiomics, Institute of Nutrition, Metabolism, and  
415 Diabetes, grant number 143924). JT is supported by the BRIDGE Translational Excellence  
416 Program (bridge.ku.dk) at the Faculty of Health and Medical Sciences, University of  
417 Copenhagen, funded by the Novo Nordisk Foundation (grant no. NNF18SA0034956). S.M.  
418 holds the Tier 1 Canada Research Chair in Bacteriophages [950-232136]. JS and DSN are  
419 recipients of Novo Nordisk Foundation grant NNF20OC0061029.

420

#### 421 **Author contributions**

422 S.M., M.A.P., J.S. and D.S.N. conceived the project and supervised all the research;  
423 B.C., K.B., J.S., S.J.S., L.J. and M.D. collected the samples and/or information; Y.Z., J.L.C.M.,  
424 S.A.S. and D.S.N. analyzed the data; Y.Z., J.L.C.M. and D.S.N. wrote the manuscript with the  
425 assistance of L.D., S.A.S., J.T., C.L.R., S.M., M.A.P. and J.S.; L.D. prepared the virome and  
426 sequencing libraries; all authors contributed to, revised and approved the final manuscript.

427

#### 428 **Competing interests**

429 All authors declare no conflicts of interest related to the present study.

430

## 431 **References**

- 432 1. Tamburini, S., Shen, N., Wu, H. C. & Clemente, J. C. The microbiome in early life:  
433 implications for health outcomes. *Nat. Med.* **22**, 713-722 (2016).
- 434 2. Stokholm, J. *et al.* Maturation of the gut microbiome and risk of asthma in childhood. *Nat.*  
435 *Commun.* **9**, 141 (2018).
- 436 3. Pihl, A. F. *et al.* The role of the gut microbiota in childhood obesity. *Child. Obes.* **12**, 292-  
437 299 (2016).
- 438 4. Kostic, A. D. *et al.* The dynamics of the human infant gut microbiome in development and  
439 in progression toward type 1 diabetes. *Cell Host Microbe* **17**, 260-273 (2015).
- 440 5. Vatanen, T. *et al.* Variation in microbiome LPS immunogenicity contributes to  
441 autoimmunity in humans. *Cell* **165**, 842-853 (2016).
- 442 6. McCann, A. *et al.* Viromes of one year old infants reveal the impact of birth mode on  
443 microbiome diversity. *PeerJ* **6**, e4694 (2018).
- 444 7. Sutton, T. D. S. & Hill, C. Gut bacteriophage: current understanding and challenges.  
445 *Front. Endocrinol.* **10**, 784 (2019).
- 446 8. Shkoporov, A. N. & Hill, C. Bacteriophages of the human gut: the “known unknown” of  
447 the microbiome. *Cell Host Microbe* **25**, 195-209 (2019).
- 448 9. Shah, S. A. *et al.* Expanding known viral diversity in the healthy infant gut. *Nat.*  
449 *Microbiol.*, Accepted (2023).
- 450 10. Gregory, A. C. *et al.* The gut virome database reveals age-dependent patterns of virome  
451 diversity in the human gut. *Cell Host Microbe* **28**, 724-740 (2020).
- 452 11. Roux, S. *et al.* IMG/VR v3: an integrated ecological and evolutionary framework for  
453 interrogating genomes of uncultivated viruses. *Nucleic Acids Res.* **49**, D764-D775  
454 (2021).
- 455 12. Kieft, K. *et al.* Ecology of inorganic sulfur auxiliary metabolism in widespread  
456 bacteriophages. *Nat. Commun.* **12**, 3503 (2021).
- 457 13. Bi, L. *et al.* Diversity and potential biogeochemical impacts of viruses in bulk and  
458 rhizosphere soils. *Environ. Microbiol.* **23**, 588-599 (2021).
- 459 14. Tisza, M. J. & Buck, C. B. A catalog of tens of thousands of viruses from human  
460 metagenomes reveals hidden associations with chronic diseases. *P Natl Acad Sci*  
461 *USA* **118**, e2023202118 (2021).
- 462 15. Clooney, A. G. *et al.* Whole-virome analysis sheds light on viral dark matter in  
463 inflammatory bowel disease. *Cell Host Microbe* **26**, 764-778 (2019).

- 464 16. Zhao, L. Y. *et al.* Uncovering 1,058 novel human enteric DNA viruses through deep  
465 long-read third-generation sequencing and their clinical impact. *Gastroenterology*  
466 **162**, S96-S96 (2022).
- 467 17. Kaelin, E. A. *et al.* Longitudinal gut virome analysis identifies specific viral signatures  
468 that precede necrotizing enterocolitis onset in preterm infants. *Nat. Microbiol.* **7**,  
469 653-662 (2022).
- 470 18. Reyes, A. *et al.* Gut DNA viromes of Malawian twins discordant for severe acute  
471 malnutrition. *P Natl Acad Sci USA* **112**, 11941-11946 (2015).
- 472 19. Zhao, G. Y. *et al.* Intestinal virome changes precede autoimmunity in type I diabetes-  
473 susceptible children. *P Natl Acad Sci USA* **114**, E6166-E6175 (2017).
- 474 20. Vehik, K. *et al.* Prospective virome analyses in young children at increased genetic risk  
475 for type 1 diabetes. *Nat. Med.* **25**, 1865-1872 (2019).
- 476 21. Tomofuji, Y. *et al.* Whole gut virome analysis of 476 Japanese revealed a link between  
477 phage and autoimmune disease. *Ann. Rheum. Dis.* **81**, 278-288 (2021).
- 478 22. Rasmussen, T. S. *et al.* Faecal virome transplantation decreases symptoms of type 2  
479 diabetes and obesity in a murine model. *Gut* **69**, 2122-2130 (2020).
- 480 23. Ott, S. J. *et al.* Efficacy of sterile fecal filtrate transfer for treating patients with  
481 clostridium difficile infection. *Gastroenterology* **152**, 799-811 (2017).
- 482 24. Brunse, A. *et al.* Fecal filtrate transplantation protects against necrotizing enterocolitis.  
483 *ISME J* **16**, 686-694 (2022).
- 484 25. Stewart, C. J. *et al.* Temporal development of the gut microbiome in early childhood  
485 from the TEDDY study. *Nature* **562**, 583-588 (2018).
- 486 26. Breitbart, M. *et al.* Viral diversity and dynamics in an infant gut. *Res. Microbiol.* **159**,  
487 367-373 (2008).
- 488 27. Lim, E. S. *et al.* Early life dynamics of the human gut virome and bacterial microbiome  
489 in infants. *Nature Medicine* **21**, 1228-1234 (2015).
- 490 28. Taboada, B. *et al.* The gut virome of healthy children during the first year of life is  
491 diverse and dynamic. *PLoS One* **16**, e0240958 (2021).
- 492 29. Liang, G. & Bushman, F. D. The human virome: assembly, composition and host  
493 interactions. *Nat. Rev. Microbiol.* **19**, 514-527 (2021).
- 494 30. Liang, G. X. *et al.* The stepwise assembly of the neonatal virome is modulated by  
495 breastfeeding. *Nature* **581**, 470-474 (2020).
- 496 31. Walters, W. A. *et al.* Longitudinal comparison of the developing gut virome in infants  
497 and their mothers. *Cell Host Microbe* **31**, 187-198 (2023).
- 498 32. Bisgaard, H. *et al.* Deep phenotyping of the unselected COPSAC2010 birth cohort study.  
499 *Clin. Exp. Allergy* **43**, 1384-1394 (2013).

- 500 33. Deng, L. *et al.* A protocol for extraction of infective viromes suitable for metagenomics  
501 sequencing from low volume fecal samples. *Viruses* **11**, 667 (2019).
- 502 34. Edwards, R. A., McNair, K., Faust, K., Raes, J. & Dutilh, B. E. Computational  
503 approaches to predict bacteriophage-host relationships. *FEMS Microbiol. Rev.* **40**,  
504 258-272 (2016).
- 505 35. Pride, D. T., Wassenaar, T. M., Ghose, C. & Blaser, M. J. Evidence of host-virus co-  
506 evolution in tetranucleotide usage patterns of bacteriophages and eukaryotic viruses.  
507 *BMC Genom.* **7**, 1-13 (2006).
- 508 36. Krupovic, M. & Forterre, P. Microviridae goes temperate: microvirus-related proviruses  
509 reside in the genomes of bacteroidetes. *PLoS One* **6**, e19893 (2011).
- 510 37. Vinding, R. K. *et al.* Fish oil supplementation in pregnancy increases gestational age,  
511 size for gestational age, and birth weight in infants: a randomized controlled trial. *J.*  
512 *Nutr.* **149**, 628-634 (2019).
- 513 38. Bisgaard, H. *et al.* Fish oil-derived fatty acids in pregnancy and wheeze and asthma in  
514 offspring. *New Engl J Med* **375**, 2530-2539 (2016).
- 515 39. Chawes, B. L. *et al.* Effect of vitamin D-3 supplementation during pregnancy on risk of  
516 persistent wheeze in the offspring: a randomized clinical trial. *JAMA* **315**, 353-361  
517 (2016).
- 518 40. Li, X. J. *et al.* The infant gut resistome associates with *E. coli*, environmental exposures,  
519 gut microbiome maturity, and asthma-associated bacterial composition. *Cell Host*  
520 *Microbe* **29**, 975-987 (2021).
- 521 41. Aramaki, T. *et al.* KofamKOALA: KEGG Ortholog assignment based on profile HMM  
522 and adaptive score threshold. *Bioinformatics* **36**, 2251-2252 (2020).
- 523 42. Sanz-Gaitero, M., Seoane-Blanco, M. & van Raaij, M. J. Structure and function of  
524 bacteriophages. *Bacteriophages: Biology, Technology, Therapy*, 1-73 (2019).
- 525 43. Warwick-Dugdale, J., Buchholz, H. H., Allen, M. J. & Temperton, B. Host-hijacking and  
526 planktonic piracy: how phages command the microbial high seas. *Viol. J.* **16**, 1-13  
527 (2019).
- 528 44. Shkoporov, A. N. *et al.* The human gut virome is highly diverse, stable, and individual  
529 specific. *Cell Host Microbe* **26**, 527-541 (2019).
- 530 45. Kim, K. H. & Bae, J. W. Amplification methods bias metagenomic libraries of  
531 uncultured single-stranded and double-stranded DNA viruses. *Appl. Environ.*  
532 *Microbiol.* **77**, 7663-7668 (2011).
- 533 46. Roux, S. *et al.* Towards quantitative viromics for both double-stranded and single-  
534 stranded DNA viruses. *PeerJ* **4**, e2777 (2016).
- 535 47. Yutin, N. *et al.* Discovery of an expansive bacteriophage family that includes the most  
536 abundant viruses from the human gut. *Nat Microbiol* **3**, 38-46 (2018).

- 537 48. Zuo, T. *et al.* Human-gut-DNA virome variations across geography, ethnicity, and  
538 urbanization. *Cell Host Microbe* **28**, 741-751 (2020).
- 539 49. Laursen, M. F. *et al.* Having older siblings is associated with gut microbiota development  
540 during early childhood. *BMC Microbiol.* **15**, 1-9 (2015).
- 541 50. Hedin, C. R., van der Gast, C. J., Stagg, A. J., Lindsay, J. O. & Whelan, K. The gut  
542 microbiota of siblings offers insights into microbial pathogenesis of inflammatory  
543 bowel disease. *Gut Microbes* **8**, 359-365 (2017).
- 544 51. Christensen, E. D. *et al.* The developing airway and gut microbiota in early life is  
545 influenced by age of older siblings. *Microbiome* **10**, 106 (2022).
- 546 52. Brown, E. M. *et al.* Gut microbiome ADP-ribosyltransferases are widespread phage-  
547 encoded fitness factors. *Cell Host Microbe* **29**, 1351-1365 (2021).
- 548 53. Alvarez, D. *et al.* Impact of maternal obesity on the metabolism and bioavailability of  
549 polyunsaturated fatty acids during pregnancy and breastfeeding. *Nutrients* **13**, 19  
550 (2020).
- 551 54. Costa, S. M. *et al.* Maternal obesity programs mitochondrial and lipid metabolism gene  
552 expression in infant umbilical vein endothelial cells. *Int J Obes (Lond)* **40**, 1627-  
553 1634 (2016).
- 554 55. Belda, E. *et al.* Impairment of gut microbial biotin metabolism and host biotin status in  
555 severe obesity: effect of biotin and prebiotic supplementation on improved  
556 metabolism. *Gut* **71**, 2463-2480 (2022).
- 557 56. Hjelmsø, M. H. *et al.* Prenatal dietary supplements influence the infant airway  
558 microbiota in a randomized factorial clinical trial. *Nat. Commun.* **11**, 426 (2020).
- 559 57. Hishikawa, D., Valentine, W. J., Iizuka-Hishikawa, Y., Shindou, H. & Shimizu, T.  
560 Metabolism and functions of docosahexaenoic acid-containing membrane  
561 glycerophospholipids. *FEBS Lett.* **591**, 2730-2744 (2017).
- 562 58. Cao, Y. *et al.* Integrated analysis of metabolomics and transcriptomics for assessing  
563 effects of fish meal and fish oil replacement on the metabolism of rainbow trout  
564 (*Oncorhynchus mykiss*). *Front. Mar. Sci.* **9**, 208 (2022).
- 565 59. Roager, H. M. *et al.* Whole grain-rich diet reduces body weight and systemic low-grade  
566 inflammation without inducing major changes of the gut microbiome: a randomised  
567 cross-over trial. *Gut* **68**, 83-93 (2019).
- 568 60. Wu, G. D. *et al.* Linking long-term dietary patterns with gut microbial enterotypes.  
569 *Science* **334**, 105-108 (2011).
- 570 61. Bergstrom, A. *et al.* Establishment of intestinal microbiota during early life: a  
571 longitudinal, explorative study of a large cohort of danish infants. *Appl. Environ.*  
572 *Microbiol.* **80**, 2889-2900 (2014).



- 573 62. Backhed, F. *et al.* Dynamics and stabilization of the human gut microbiome during the  
574 first year of life. *Cell Host Microbe* **17**, 690-703 (2015).
- 575 63. Roswall, J. *et al.* Developmental trajectory of the healthy human gut microbiota during  
576 the first 5 years of life. *Cell Host Microbe* **29**, 765-776 (2021).
- 577 64. Larsen, J. M. The immune response to Prevotella bacteria in chronic inflammatory  
578 disease. *Immunology* **151**, 363-374 (2017).
- 579 65. Park, H., Shin, J. W., Park, S. G. & Kim, W. Microbial communities in the upper  
580 respiratory tract of patients with asthma and chronic obstructive pulmonary disease.  
581 *PLoS One* **9**, e109710 (2014).
- 582 66. McMurdie, P. J. & Holmes, S. phyloseq: an R package for reproducible interactive  
583 analysis and graphics of microbiome census data. *PLoS One* **8**, e61217 (2013).
- 584 67. Dixon, P. VEGAN, a package of R functions for community ecology. *J. Veg. Sci.* **14**,  
585 927-930 (2003).
- 586 68. Kuznetsova, A., Brockhoff, P. B. & Christensen, R. H. B. lmerTest Package: tests in  
587 linear mixed effects models. *J. Stat. Softw.* **82**, 1-26 (2017).
- 588 69. Russel, J. *et al.* DAtest: a framework for choosing differential abundance or expression  
589 method. *bioRxiv*, 241802 (2018).
- 590 70. Love, M. I., Huber, W. & Anders, S. Moderated estimation of fold change and dispersion  
591 for RNA-seq data with DESeq2. *Genome Biol.* **15**, 550 (2014).
- 592 71. Katoh, K. & Standley, D. M. MAFFT multiple sequence alignment software version 7:  
593 improvements in performance and usability. *Mol. Biol. Evol.* **30**, 772-780 (2013).
- 594 72. Yu, G. C., Smith, D. K., Zhu, H. C., Guan, Y. & Lam, T. T. Y. GGTREE: an R package  
595 for visualization and annotation of phylogenetic trees with their covariates and other  
596 associated data. *Methods Ecol. Evol.* **8**, 28-36 (2017).
- 597 73. Hyatt, D. *et al.* Prodigal: prokaryotic gene recognition and translation initiation site  
598 identification. *BMC Bioinform.* **11**, 1-11 (2010).
- 599 74. Wu, T. *et al.* clusterProfiler 4.0: A universal enrichment tool for interpreting omics data.  
600 *Innovation (Camb)* **2**, 100141 (2021).
- 601 75. Hadley, W. ggplot2: elegant graphics for data analysis. *Springer-Verlag New York*  
602 (2016).
- 603  
604  
605  
606  
607  
608  
609

Figure 1

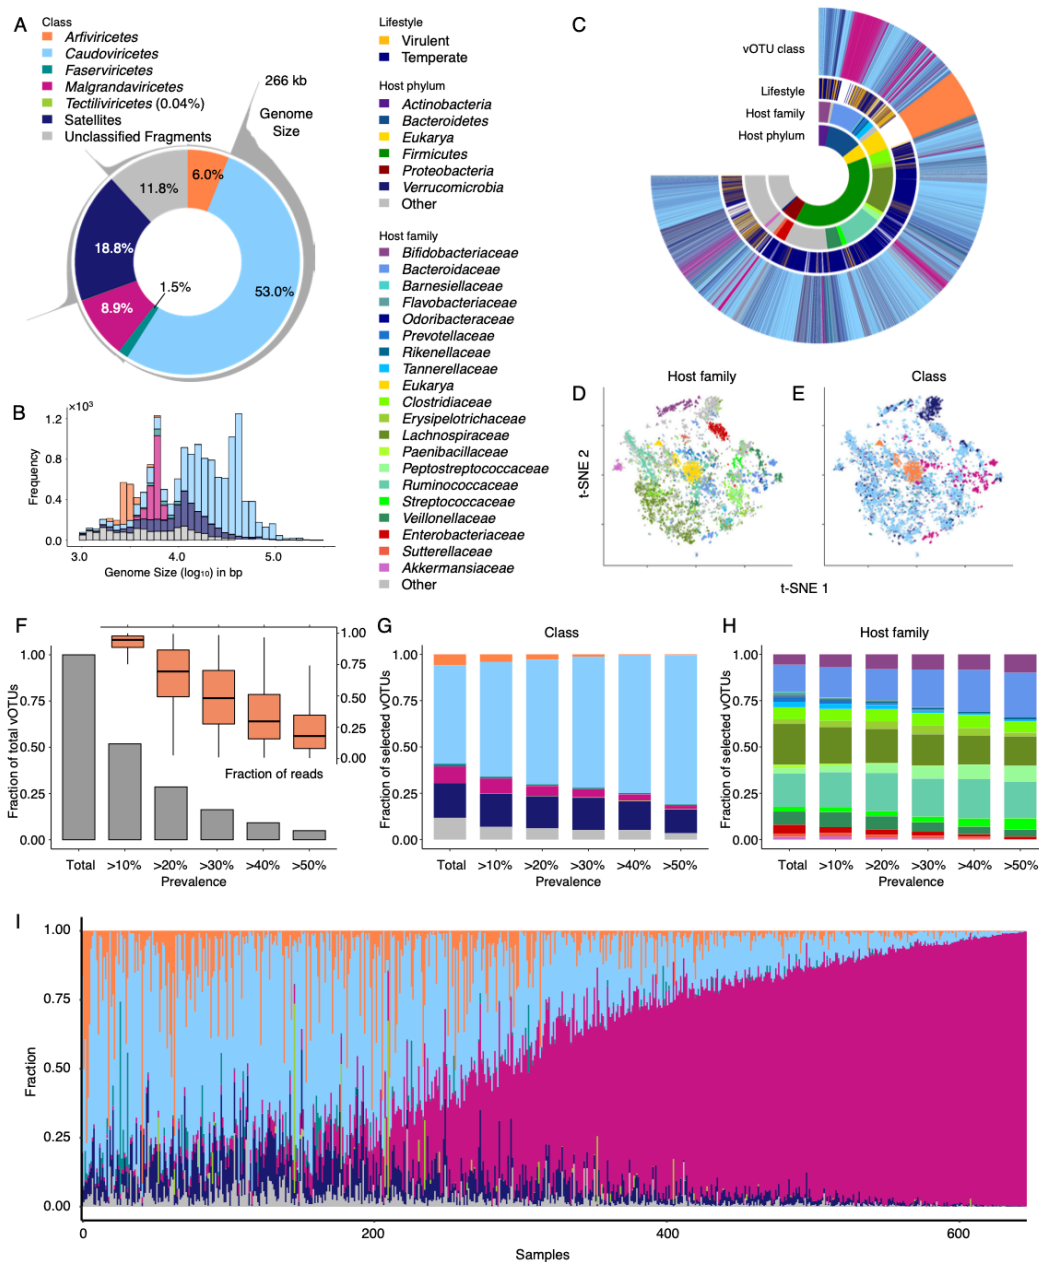

610

611 **Figure 1. Virome structure of the infants enrolled in the COPSAC<sub>2010</sub> cohort**

612 A) Distribution of the 16118 vOTUs identified colored by their taxonomic class annotation.

613 B) Cumulative frequency of viral genomes (kb) identified by their taxonomic class annotation.

614 C) Circular diagram showing the distribution of vOTUs colored by their targeted bacterial hosts (at phylum and family levels), viral class and lifestyle.

615 D-E) t-Stochastic Neighbor Embedding (t-SNE) plots clustering *tetra*-mer vOTUs profiles identified according to host family (D) and viral class (E).

616 F-H) Percentage of vOTUs that appear at a specific prevalence (F), and vOTUs' distribution

617 colored by their taxonomic class (G) and host family (H).

618

619

620 I) Relative abundance of vOTUs across all samples at the class level. Samples were sorted by  
 621 *Malgrandaviricetes* abundance.  
 622

Figure 2

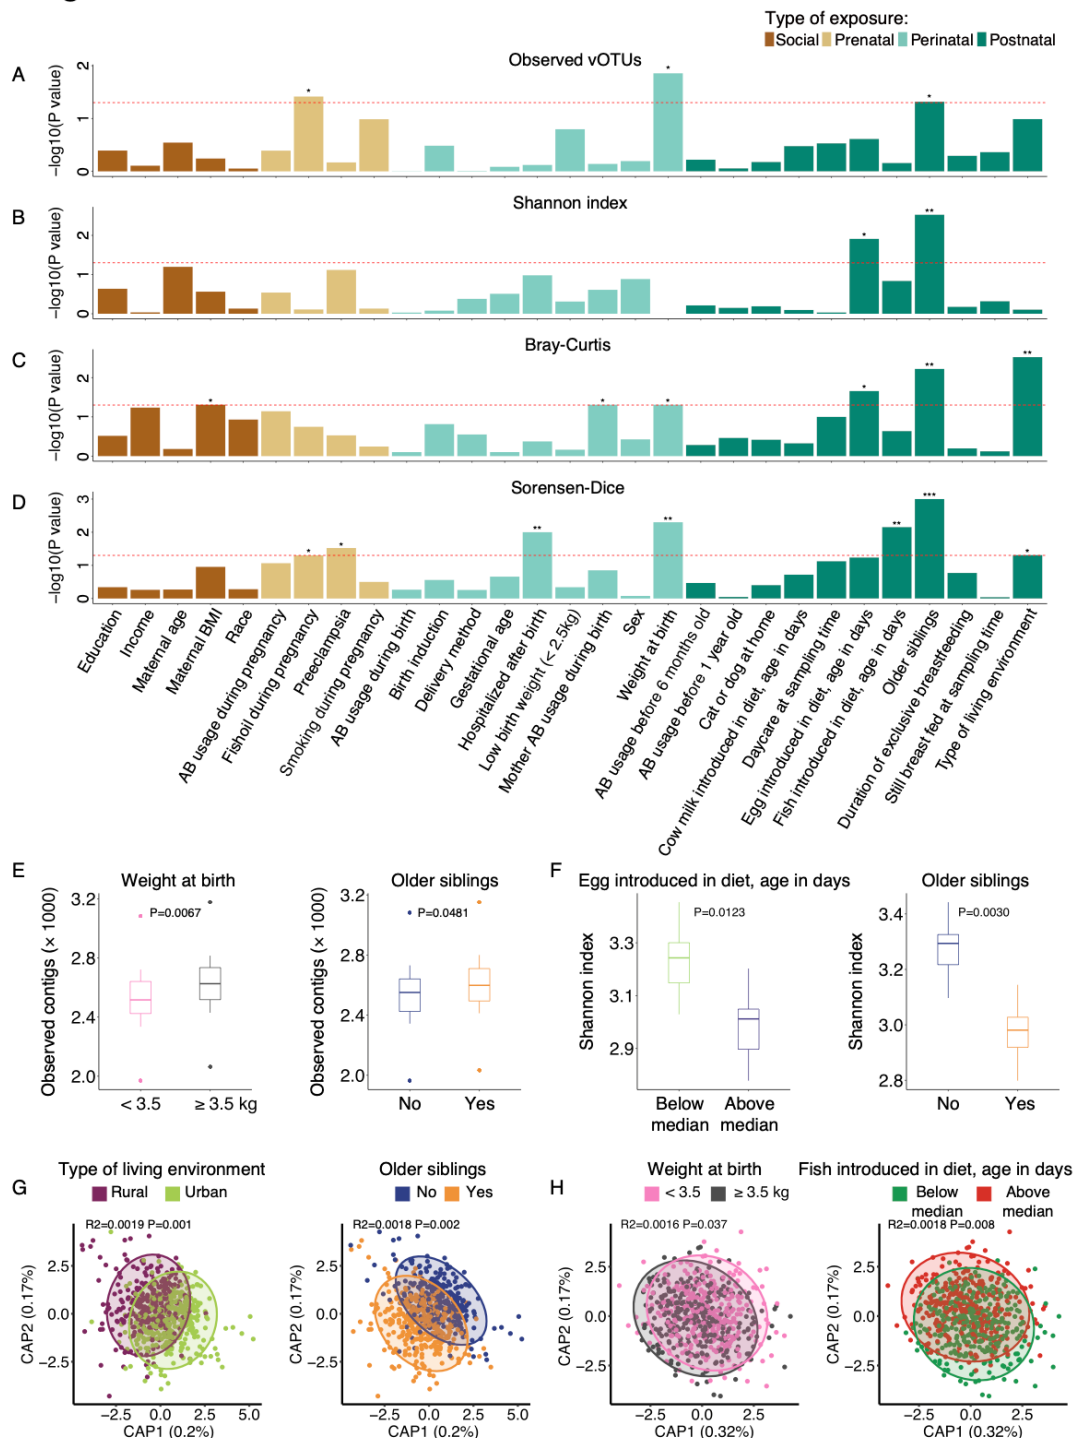

623

624 **Figure 2. Virome diversity and composition covariates with early life exposures**

625 A-D) Barplot showing the strength of associations ( $-\log_{10}$  p-value) of the alpha diversity  
 626 metrics Observed vOTUs (A) and Shannon Index (B) across different exposures (linear mixed

627 model) as well as beta diversity using distance-based redundancy analysis (db-RDA) on Bray-  
 628 Curtis dissimilarity (C) and Sorensen-Dice distance (D) matrices.  
 629 E-F) Distribution of Observed vOTUs for weight at birth and siblings (E) and Shannon Index  
 630 for siblings and dietary introduction of egg (F). Dietary introduction of egg is indicated in  
 631 days.  
 632 G-H) db-RDA constrained-components based on Bray-Curtis distances for location and  
 633 siblings (G), and Sorensen-Dice distances for weight at birth and dietary introduction of fish  
 634 (H).  
 635

Figure 3

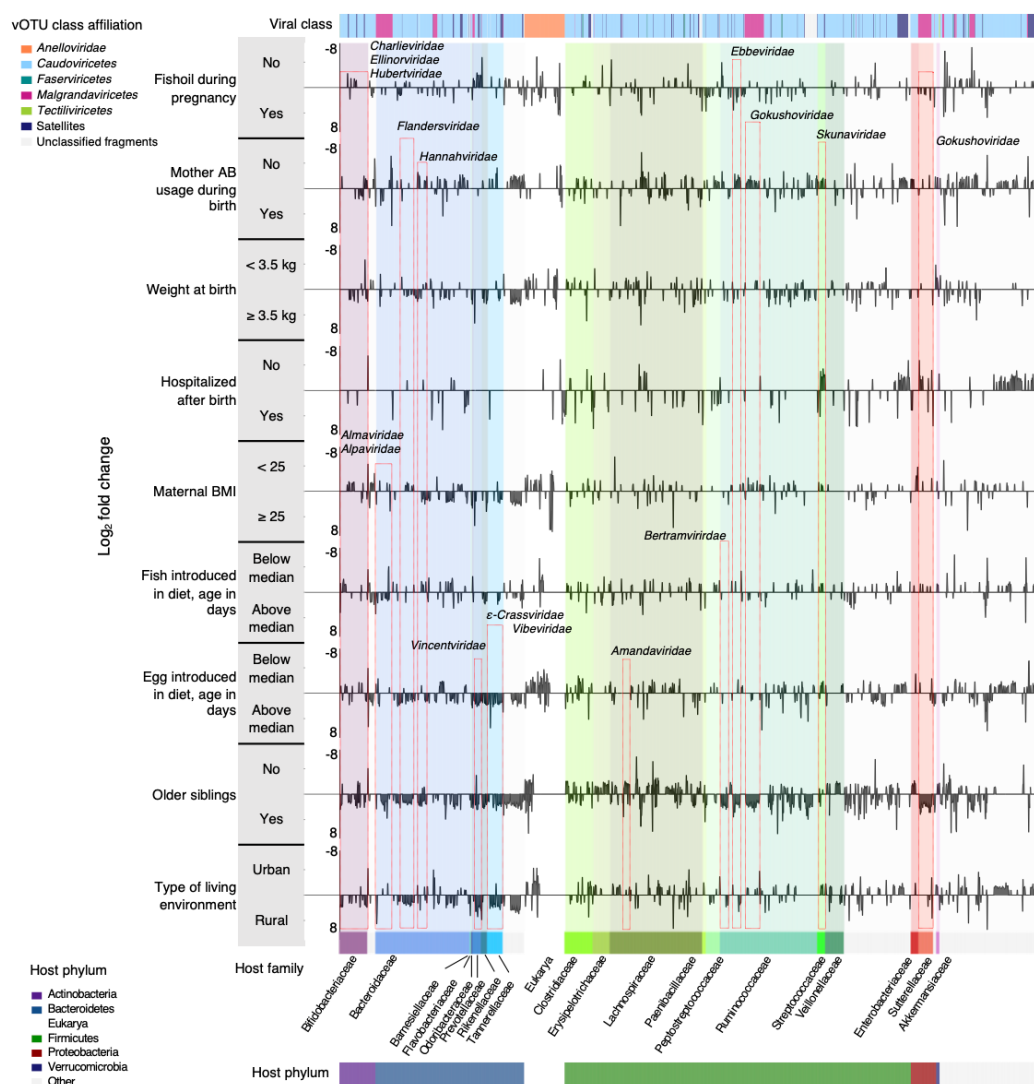

636  
 637 **Figure 3. Viral host family, relative abundance and lifestyle associate with environmental**  
 638 **exposures at one year of age.**  
 639 Visualization of differential abundance analysis of 2105 vOTUs across the nine exposures  
 640 significantly associated with virome diversity and composition. Log<sub>2</sub> fold change panel

641 displays the change in abundance between the two groups for each exposure. The viral families  
 642 to which vOTU belongs, surrounded by red boxes, are labeled. Adjusted  $P \leq 0.001$  and  $\text{Log}_2$ -  
 643 Fold changes  $\geq |1|$  were used to select differentially abundant vOTUs.  
 644

Figure 4

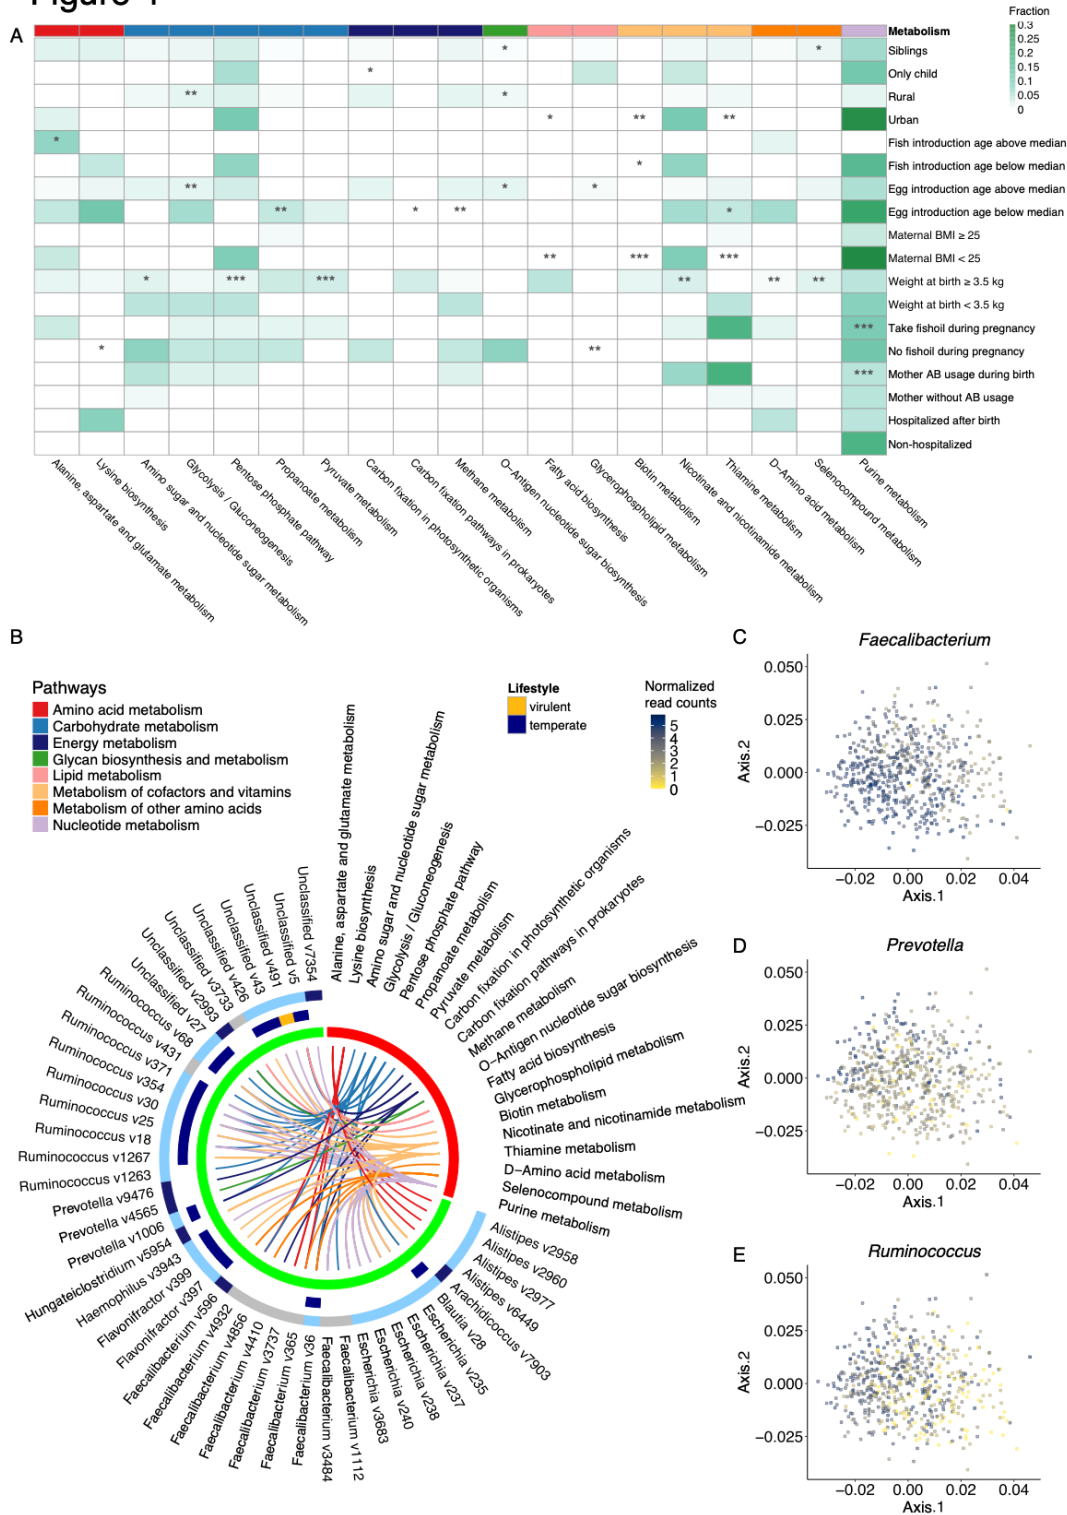

645

646

Figure 4. Abundance of phage accessory genes differ in connection with exposures

647 A) Abundance of genes (3<sup>rd</sup> level KEGG pathway) in the virome of infants with significant  
648 ( $P \leq 0.05$ ) enzymatic enrichments that are associated with the presence of siblings and  
649 residential location.  
650 B) Viral host families that contribute to metabolism pathways.  
651 C-E) Bacterial points extracted from the procrustes analysis (E). The points are colored  
652 according to the abundance of the specific genus in each sample.  
653  
654
